# Supplementary material for: CRISPR/Cas9-Mediated Genome Editing Corrects Dystrophin Mutation in Skeletal Muscle Stem Cells in a Mouse Model of Muscle Dystrophy
Source: PubMed Central journal article supplement — Mol Ther Nucleic Acids. 2017 Feb 28;7:31–41. doi: 10.1016/j.omtn.2017.02.007 (PMC5363682; doi:10.1016/j.omtn.2017.02.007), 2017-02-28
Supplement: mmc1.pdf [file mmc1.pdf]

OMTN, Volume 7

## **Supplemental Information**

### **CRISPR/Cas9-Mediated Genome Editing Corrects Dystrophin Mutation in Skeletal Muscle Stem Cells in a Mouse Model of Muscle Dystrophy**

**Pei Zhu, Furen Wu, Jeffrey Mosenson, Hongmei Zhang, Tong-Chuan He, and Wen-Shu Wu**

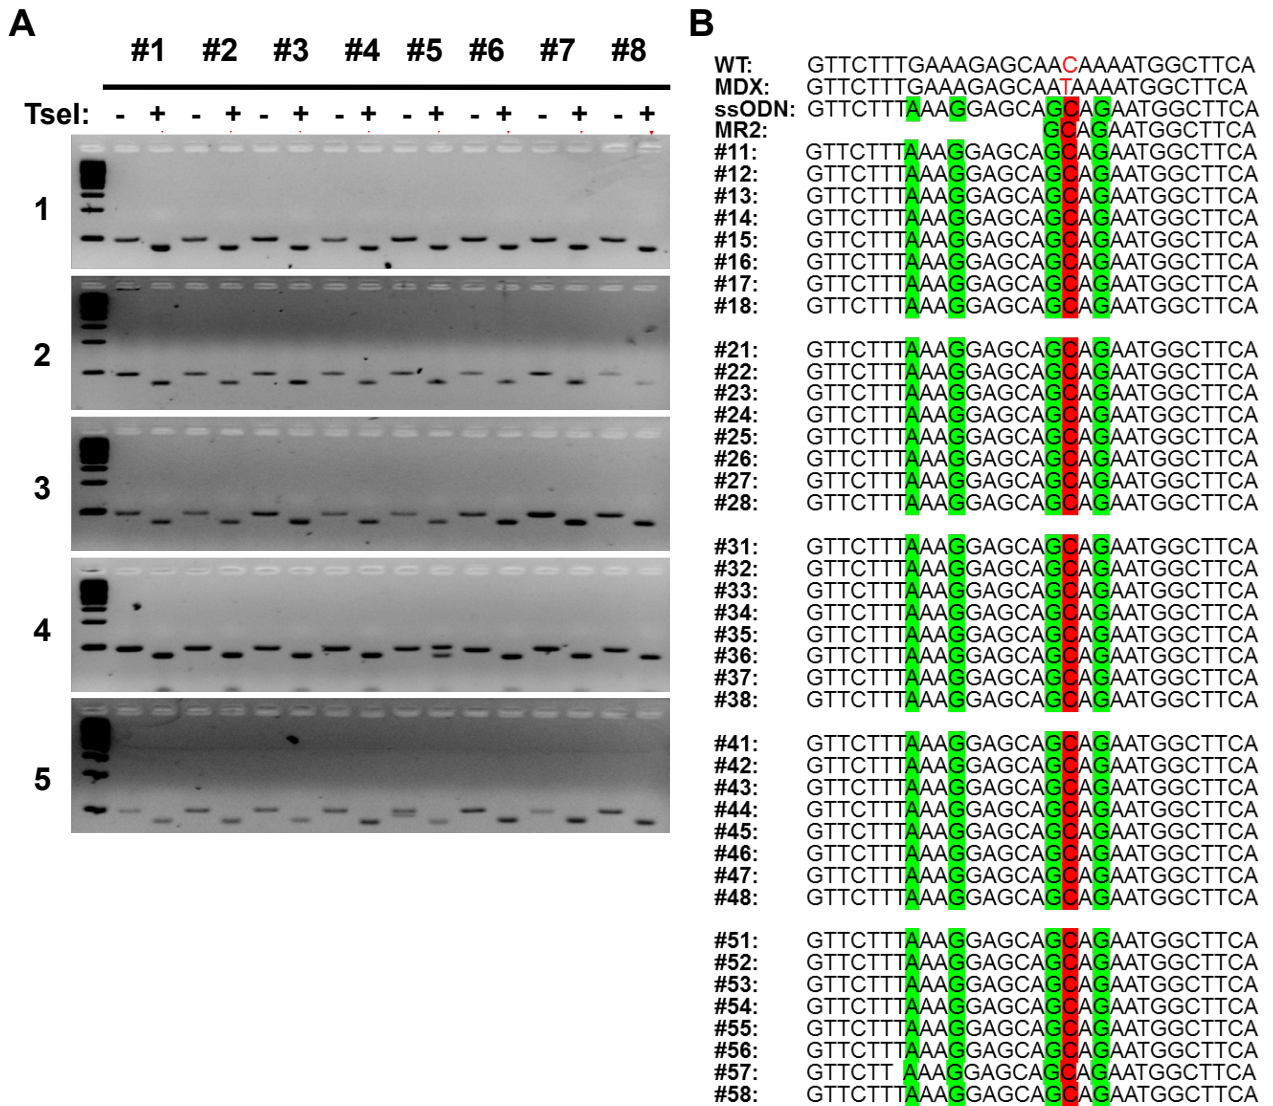

**Supplementary Figure 1. HDR-mediated gene editing of *Dmd* in myofibroblasts of *mdx* mice.**

(A) Tsel digestion confirming HDR-mediated *Dmd* correction in myofibroblasts of *mdx* mice. Allele-specific PCR products from genomic DNA of cultured MuSC were sub-cloned into TOPO cloning vector, followed by colony-PCR with the same pair of allele-specific primers. PCR products from individual colonies were directly digested by Tsel.

(B) Confirmation of HDR-mediated *Dmd* correction in cultured skeletal muscle-derived fibroblasts by DNA sequencing. TOPO clones referred in (A) were sequenced. Silent mutations were indicated with green letters. Point mutations were indicated with red letters.

| <b>Primers</b> | <b>sequences (5'-3')</b>                                                                          |
|----------------|---------------------------------------------------------------------------------------------------|
| Mdx-F1         | GACACTTTACCACCAATGCGCTATCAGGAG                                                                    |
| Mdx-R1         | GAGTCAGACATGGATGCAATGCCACC                                                                        |
| LA-F           | GAACATGTCTTATCAGTCAAGAGATC                                                                        |
| SM-R2          | CAGATAGTTGAAGCCATTCTGC                                                                            |
| SM-R1          | CCTCGATTTCTCGAACTCA                                                                               |
| Mdx-F2         | CTCATCAAATATGCGTGTTAGTG                                                                           |
| Mdx-R2         | GGCAGCTTTCCACCAACTG                                                                               |
| ssODN          | G*A*A*GATAAATTAAACTCCGAGACGTTTCAAGAAATTT<br>CCTCGTCGTCTTACCGAAGTTGATAGACTCACTGTGACA<br>CTTC*C*T*C |

**Supplementary Table 1**
